# Supplementary material for: Mitochondria–ER–PM contacts regulate mitochondrial division and PI(4)P distribution
Source: PubMed Central journal article supplement — J Cell Biol. 2024 May 23;223(9):e202308144. doi: 10.1083/jcb.202308144 (PMC11116812; doi:10.1083/jcb.202308144), 2024-05-23
Supplement: JCB_202308144_SourceDataF5.pdf [file JCB_202308144_SourceDataF5.pdf]

Efr3-GFP - + +  
 Num1-HA - - +

- + +  
 - - +

- + +  
 - - +

- + +  
 - - +

- + +  
 - - +

- + +  
 - - +

205 kDa  
 120 kDa  
 85 kDa  
 65 kDa  
 50 kDa  
 30 kDa  
 25 kDa

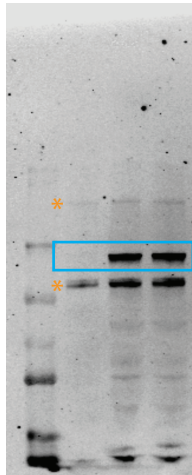

$\alpha$ -GFP

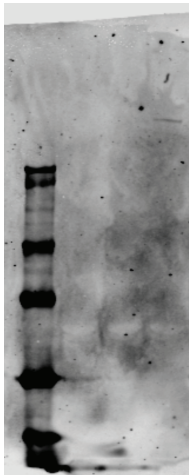

Low contrast

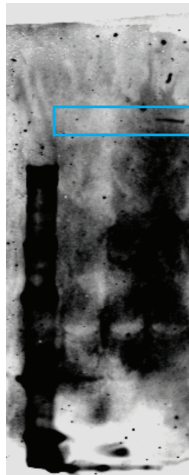

High contrast

$\alpha$ -HA

Lysate Input  
 (2.5%)

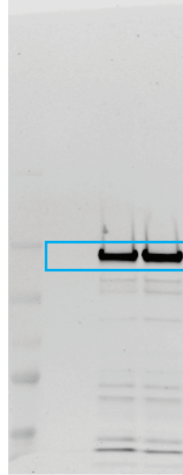

$\alpha$ -GFP

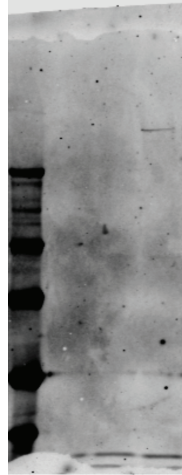

Low contrast

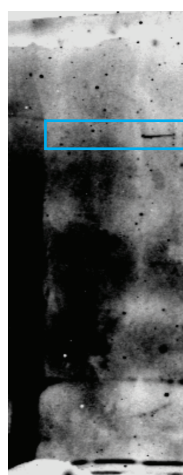

High contrast

$\alpha$ -HA

IP ( $\alpha$ -GFP)
