# Supplementary figures and images for: Mitochondria–ER–PM contacts regulate mitochondrial division and PI(4)P distribution
Source: PubMed Central journal article supplement — J Cell Biol. 2024 May 23;223(9):e202308144. doi: 10.1083/jcb.202308144 (PMC11116812; doi:10.1083/jcb.202308144), 2024-05-23

|                       |   |   |   |   |   |   |   |   |   |   |
|-----------------------|---|---|---|---|---|---|---|---|---|---|
| GFP-Scs2              | - | + | + | + | + | - | + | + | + | + |
| Num1-HA               | - | - | + | - | - | - | - | + | - | - |
| Num1 $\Delta$ FFAT-HA | - | - | - | + | - | - | - | - | + | - |
| Num1(F2135A)-HA       | - | - | - | - | + | - | - | - | - | + |

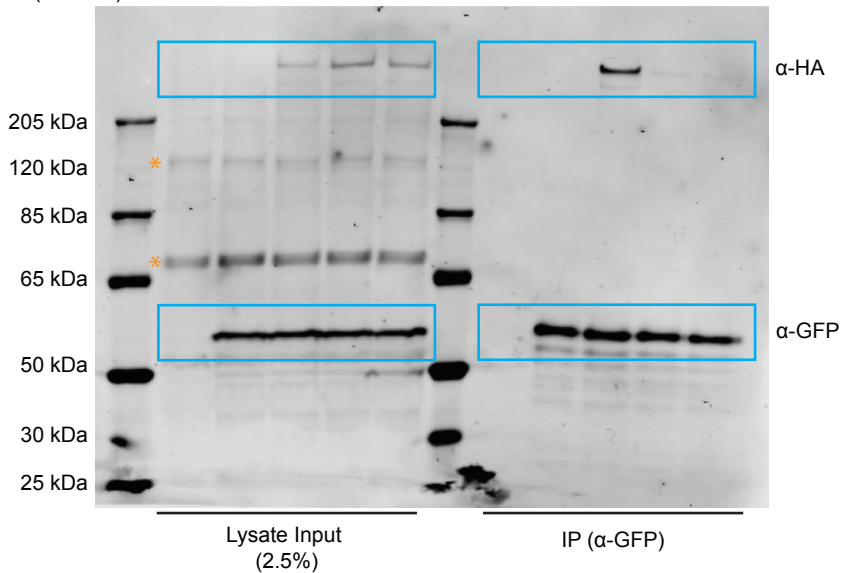

Supplement: JCB_202308144_SourceDataF1.pdf [file JCB_202308144_SourceDataF1.pdf]

|  | WT |   | <i>Efr3-AID</i> |    |    | Tir1 |    |    | <i>num1Δ</i><br>Tir1 |    |    | Minutes after<br>auxin treatment |
|--|----|---|-----------------|----|----|------|----|----|----------------------|----|----|----------------------------------|
|  | 0  |   | 0               | 30 | 60 | 0    | 30 | 60 | 0                    | 30 | 60 |                                  |
|  | 0  | 0 | 0               | 30 | 60 | 0    | 30 | 60 | 0                    | 30 | 60 |                                  |

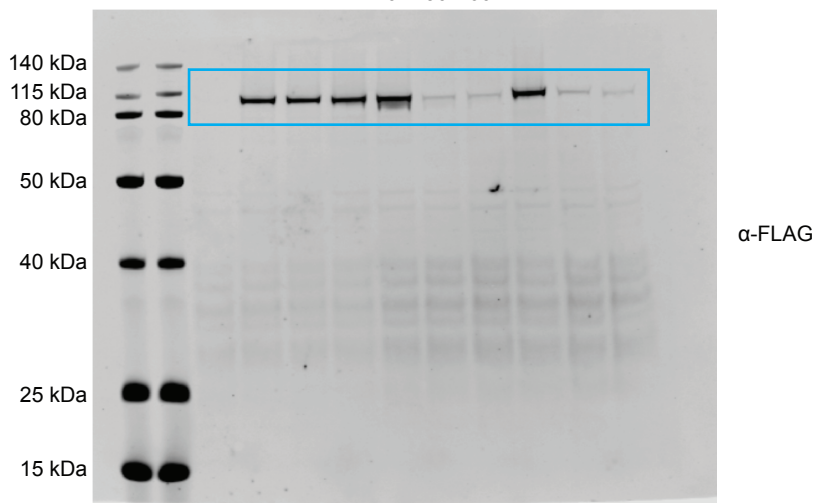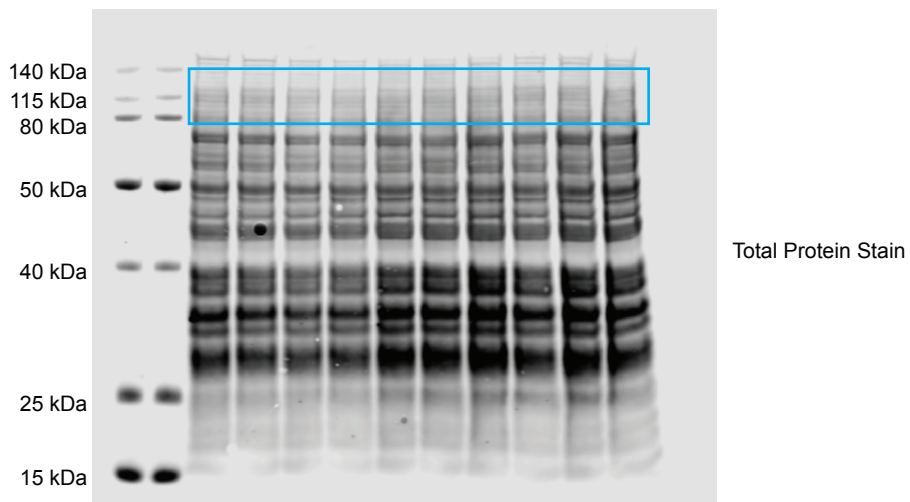

Supplement: JCB_202308144_SourceDataF8.pdf [file JCB_202308144_SourceDataF8.pdf]
